# Supplementary material
Source: PubMed Central journal article supplement (PMC5016196)
Supplement: NIHMS814172-supplement-corrigendum.pdf [file NIHMS814172-supplement-corrigendum.pdf]

## Correction

After publication of “Evolution in stage-structured populations” (Barfield et al. 2011), the authors found an error.

In the paragraph containing equation (A4) on page 406, the normal random variable covariance matrix should have been half of  $\mathbf{V}_{LE}$  rather than  $\mathbf{V}_{LE}$ , and  $\mathbf{V}_{LE}$  should have been inverted in the exponentiated term. It should be noted that this expression is not used in the rest of the article, and so this correction does not (for instance) alter the authors’ findings regarding the extension of Lande’s and Price’s theorems to stage-structured populations. With these changes (and the addition of references), the paragraph should read:

A special case of interest is the infinitesimal model of inheritance (Fisher 1918; Bulmer 1971). With this model, the (multivariate) breeding value of an offspring is the average of the breeding values of its two parents plus a zero-mean normal random variable with a covariance matrix of half of  $\mathbf{V}_{LE}$  (the additive-genetic covariance matrix among the  $m$  characters at linkage equilibrium). In this case, the offspring genotype PDF is given by

$$\omega_i(\mathbf{g}) = \Phi_i\left(\frac{\mathbf{g}}{2}\right) * \Phi_i\left(\frac{\mathbf{g}}{2}\right) * \frac{1}{\sqrt{(2\pi)^m \det(\mathbf{V}_{LE}/2)}} \exp(-\mathbf{g}^T \mathbf{V}_{LE}^{-1} \mathbf{g}), \quad (\text{A4})$$

where the asterisk indicates convolution (Turelli and Barton 1994; Tufto 2000). The arguments of the parents’ PDFs are halved because parental genotypes are averaged.

### Literature Cited

- Barfield, Michael, Robert D. Holt, and Richard Gomulkiewicz. 2011. Evolution in stage-structured populations. *American Naturalist* 177:397–409.
- Bulmer, M. G. 1971. The effect of selection on genetic variability. *American Naturalist* 105:201–211.
- Fisher, R. A. 1918. The correlation between relatives on supposition of Mendelian inheritance. *Transactions of the Royal Society of Edinburgh* 52:399–433.
- Tufto, J. 2000. Quantitative genetic models for the balance between migration and stabilizing selection. *Genetical Research* 76:285–293.
- Turelli, M., and N. H. Barton. 1994. Genetic and statistical analysis of strong selection on polygenic traits: what, me normal? *Genetics* 138:913–941.

MICHAEL BARFIELD,<sup>1</sup> ROBERT D. HOLT,<sup>1</sup> and  
RICHARD GOMULKIEWICZ<sup>2</sup>

1. Department of Biology, University of Florida, Gainesville, Florida 32611; 2. School of Biological Sciences, Washington State University, Pullman, Washington 99164

*Submitted June 11, 2012*
